# Supplementary material
Source: HighWire-hosted journal article supplement (http://www.cmaj.ca/highwire/filestream/58736/field_highwire_adjunct_files/0/charter-flood-1-at.pdf)
Supplement: charter-flood-1-at.pdf [file charter-flood-1-at.pdf]

**Appendix 1 (as supplied by the authors): International Patients' Rights Legislation/Charters**

| Jurisdiction | Legislation/Charter                                                                                                                                                                                                                                                                                                             | Critical Literature (Where Available)                                                                                                                                                                                                                                                                                                               |
|--------------|---------------------------------------------------------------------------------------------------------------------------------------------------------------------------------------------------------------------------------------------------------------------------------------------------------------------------------|-----------------------------------------------------------------------------------------------------------------------------------------------------------------------------------------------------------------------------------------------------------------------------------------------------------------------------------------------------|
| Australia    | <p><i>Australian Charter of Healthcare Rights</i> (2008): -<br/> <a href="http://www.health.gov.au/internet/safety/publishing.nsf/content/com-pubs_ACHR-pdf-01-con/\$File/17537-charter.pdf">http://www.health.gov.au/internet/safety/publishing.nsf/content/com-pubs_ACHR-pdf-01-con/\$File/17537-charter.pdf</a></p>          |                                                                                                                                                                                                                                                                                                                                                     |
| Austria      | <p><a href="#"><u><i>Patients' Charter</i> (2002)</u></a></p>                                                                                                                                                                                                                                                                   | <p>Bachinger J. The Patient Ombudsman System in Austria. In: Mackenney S, Fallberg L, editors. <i>Protecting patients' rights? A comparative study of the Ombudsman in healthcare</i>. Oxon (United Kingdom): Radcliffe Medical Press Ltd.; 2004. p. 13-23.</p>                                                                                     |
| Belgium      | <p><i>Act Concerning the Rights of the Patient</i> (2002): <a href="http://www.ncd-law.be/publications/Publicatie_Rights%20of%20the%20patient.pdf">http://www.ncd-law.be/publications/Publicatie_Rights%20of%20the%20patient.pdf</a></p> <p>Note: The link is to a summary of the <i>Act</i>, not to the <i>Act</i> itself.</p> | <p>Corens D. Belgium: Health system review. <i>Health Syst Transit</i>. 2007; 9(2): 1–172.</p>                                                                                                                                                                                                                                                      |
| Croatia      | <p><i>Act on the Protection of Patients' Rights</i> (2004)</p>                                                                                                                                                                                                                                                                  | <p>Borovečki A, Babić- Bosanac S, ten Have H. The Status of the Implementation of the Act On The Protection Of Patients' Rights In Croatia- A Pilot Study. <i>Romanian Journal of Bioethics</i> 2010;8(3):136-148.</p> <p>Babić-Bosanac S, Dzakula A. Patients' rights in the Republic of Croatia. <i>Eur J Health Law</i>. 2006;13(4):399-411.</p> |

|                |                                                                                                                                                                                         |                                                                                                                                                                                                                                                                                                   |
|----------------|-----------------------------------------------------------------------------------------------------------------------------------------------------------------------------------------|---------------------------------------------------------------------------------------------------------------------------------------------------------------------------------------------------------------------------------------------------------------------------------------------------|
| Cyprus         | <a href="#"><u>Law on the protection of the rights of patients and related issues (2005)</u></a>                                                                                        | Goffin T, Borry P, Dierickx K, Nys H. <i>Patient Rights in the EU - Cyprus</i> . Leuven (Belgium): European Ethical-Legal Papers, 2007.                                                                                                                                                           |
| Czech Republic | <i>Code of Patients' Rights in Health Institutions</i> (1992)                                                                                                                           | Nys H, Goffin T, Stultiëns L, Borry P, Dierickx K. <i>Patient Rights in the EU – Czech Republic</i> . Leuven (Belgium): European Ethical-Legal Papers, 2006.                                                                                                                                      |
| Denmark        | Health Act (No. 546 of 2005) (Incorporates patients' rights)                                                                                                                            | Strandberg-Larsen M, Nielsen MB, Vallgarda S, Krasnik A, Vrangbaek K. Denmark: Health system review. <i>Health Syst Transit</i> . 9(6): 1–164.                                                                                                                                                    |
| Dubai          | <i>Dubai Healthcare City Patient Charter</i> (2011)<br><a href="http://dhcc.ae/dubai-healthcare-city-patient-charter/"><u>http://dhcc.ae/dubai-healthcare-city-patient-charter/</u></a> |                                                                                                                                                                                                                                                                                                   |
| Estonia        | <i>Law of Obligations Act (RT I 2001, 81, 487) - Chapter 41: "Contract for Provision of Health Care Services"</i> (2001)<br><br>-Specifically grants patients clearly-defined rights.   | Koppel A, Kahur K, Habicht T, Saar P, Habicht J, van Ginneken E. Estonia: Health system review. <i>Health Syst. Transit</i> . 2008; 10(1): 1-230.<br><br>Nys H, Goffin T, Borry P, Dierickx K. <i>Patient Rights in the EU – Estonia</i> . Leuven (Belgium): European Ethical-Legal Papers, 2007. |

|                |                                                                        |                                                                                                                                                                                                                                                                                                                                                                                                                                                                                |
|----------------|------------------------------------------------------------------------|--------------------------------------------------------------------------------------------------------------------------------------------------------------------------------------------------------------------------------------------------------------------------------------------------------------------------------------------------------------------------------------------------------------------------------------------------------------------------------|
| European Union | <a href="#"><u>European Charter of Patients' Rights (2002)</u></a>     |                                                                                                                                                                                                                                                                                                                                                                                                                                                                                |
| Finland        | <a href="#"><u>Act on the Status and Rights of Patients (1992)</u></a> | <p>Kuosmanen L, Kaltiala-Heino R, Suominen S, Kärkkäinen J, Hätönen H, Ranta S, Välimäki M. Patient complaints in Finland 2000-2004: a retrospective register study. <i>J Med Ethics</i>. 2008 ;34(11):788-92.</p> <p>Fallberg L, Kattelus M. The Ombudsman in Finland. In: Mackenney S, Fallberg L, editors. <i>Protecting patients' rights? A comparative study of the Ombudsman in healthcare</i>. Oxon (United Kingdom): Radcliffe Medical Press Ltd.; 2004. p. 25-31.</p> |
| France         | <a href="#"><u>Law No. 2002-303 (2002)</u></a>                         | Giugliani C, Gault N, Fares V, Jegu J, Eleni dit Trolli S, Biga J, Vidal-Treca G. Evolution of                                                                                                                                                                                                                                                                                                                                                                                 |

|           |                                                                                                                                 |                                                                                                                                                                                                                                                                                                                                    |
|-----------|---------------------------------------------------------------------------------------------------------------------------------|------------------------------------------------------------------------------------------------------------------------------------------------------------------------------------------------------------------------------------------------------------------------------------------------------------------------------------|
|           |                                                                                                                                 | <p>patients' complaints in a French university hospital: is there a contribution of a law regarding patients' rights? BMC Health Services Research 2009, 9:141-50.</p> <p>Chevreur K, Durand-Zaleski I, Bahrami S, Hernández-Quevedo C and Mladovsky P. France: Health system review. Health Syst Transit. 2010; 12(6): 1–291.</p> |
| Georgia   | <a href="#"><i>The Law of Georgia on the Rights of Patients (2000)</i></a>                                                      | Chanturidze T, Ugulava T, Durán A, Ensor T, Richardson E. Georgia: Health system review. Health Syst Transit. 2009;11(8):1-116.                                                                                                                                                                                                    |
| Germany   | <i>Charter of the Rights of Patients (1999)</i>                                                                                 |                                                                                                                                                                                                                                                                                                                                    |
| Ghana     | <a href="#"><i>Patients' Charter (2002)</i></a>                                                                                 | Abekah-Nkrumah G, Manu A, Atinga RA. Assessing the implementation of Ghana's Patient Charter. Health Education 2010;110(3):169-185.                                                                                                                                                                                                |
| Hong Kong | <i>Patients' Charter (1999):</i><br><a href="http://www.ha.org.hk/charter/pceng.htm">http://www.ha.org.hk/charter/pceng.htm</a> |                                                                                                                                                                                                                                                                                                                                    |
| Hungary   | <a href="#"><i>Rights and Obligations of Patients (According to Act LCIV of 1997 on Health) (1997)</i></a>                      | Sándor J. Ombudspersons and patients' rights representatives in Hungary. In: Mackenney S, Fallberg L, editors. <i>Protecting patients' rights? A comparative study of the Ombudsman in healthcare</i> . Oxon (United Kingdom): Radcliffe Medical Press Ltd.; 2004. p. 55-76.                                                       |

|         |                                                                       |                                                                                                                                                                                                                                                                                                                                                                                                                                                                                                                                                                                   |
|---------|-----------------------------------------------------------------------|-----------------------------------------------------------------------------------------------------------------------------------------------------------------------------------------------------------------------------------------------------------------------------------------------------------------------------------------------------------------------------------------------------------------------------------------------------------------------------------------------------------------------------------------------------------------------------------|
| Iceland | <a href="#"><u>Patients Rights Act No 74/1997 (1997)</u></a>          |                                                                                                                                                                                                                                                                                                                                                                                                                                                                                                                                                                                   |
| Iran    | <i>Patients' Rights Charter (2002)</i>                                | <p>Joolae S, Tschudin V, Nikbakht-Nasrabadi A, Parsa-Yekta Z. Factors affecting patients' rights practice: the lived experiences of Iranian nurses and physicians. <i>Int Nurs Rev.</i> 2008 Mar;55(1):55-61.</p> <p>Nejad EM, Begjani J, Abotalebi G, Salari A, Ehsani SR. Nurses awareness of patients rights in a teaching hospital. <i>Journal of Medical Ethics and History of Medicine</i> 2011;4(2).</p> <p>Joolae S, Nikbakht-Nasrabadi A, Parsa-Yekta Z, Tschudin V, Mansouri I. An Iranian perspective on patients' rights. <i>Nurs Ethics.</i> 2006;13(5):488-502.</p> |
| Ireland | <a href="#"><u>Charter of Rights for Hospital Patients (1995)</u></a> |                                                                                                                                                                                                                                                                                                                                                                                                                                                                                                                                                                                   |
| Israel  | <a href="#"><u>Patient's Rights Act (1996)</u></a>                    | <p>Hildesheimer GM, Shalev C. The Ombudsman in Israel. In: Mackenney S, Fallberg L, editors. <i>Protecting patients' rights? A comparative study of the Ombudsman in healthcare.</i> Oxon (United Kingdom): Radcliffe Medical Press Ltd.; 2004. p. 77-90.</p> <p>Rosen B, Samuel H. Israel: Health system review. <i>Health Syst Transit.</i> 11(2): 1-226.</p> <p>Yakov G, Shilo Y, Shor T.</p>                                                                                                                                                                                  |

|             |                                                                                                                                                                                                                        |                                                                                                                                                             |
|-------------|------------------------------------------------------------------------------------------------------------------------------------------------------------------------------------------------------------------------|-------------------------------------------------------------------------------------------------------------------------------------------------------------|
|             |                                                                                                                                                                                                                        | Nurses' perceptions of ethical issues related to patients' rights law.<br>Nurs Ethics. 2010 Jul;17(4):501-10.                                               |
| Italy       | <i>Code of Medical Ethics</i> (1996)                                                                                                                                                                                   | Lo Scalzo A, Donatini A, Orzella L, Cicchetti A, Profili S, Maresso A, Simões J. Italy: Health system review. Health Syst Transit. 2009; 11(6):1-214.       |
| Kenya       | <i>Patients' Rights Charter</i> (2006)                                                                                                                                                                                 | Ojwang BO, Ogutu EA, Matu PM. Nurses' impoliteness as an impediment to patients' rights in selected Kenyan hospitals. Health Hum Rights. 2010;12(2):101-17. |
| Lithuania   | <a href="#"><u>Law on the Rights of Patients and the Damage Done to Patients (1996)</u></a>                                                                                                                            | Ducinskiene D, Vladickiene J, Kalediene R, Haapala I. Awareness and practice of patient's rights law in Lithuania. World Hosp Health Serv. 2007;43(3):22-6. |
| Malaysia    | <i>Patient's Charter</i> (1995):<br><a href="http://www.mma.org.my/Resources/Charters/Patientscharter/tabid/81/Default.aspx"><u>http://www.mma.org.my/Resources/Charters/Patientscharter/tabid/81/Default.aspx</u></a> |                                                                                                                                                             |
| Malta       | Patients' Rights Charter (1998) (Issued by the Malta College of Family Doctors)                                                                                                                                        |                                                                                                                                                             |
| Netherlands | <a href="#"><u>Act on the Medical Treatment Contract (1994)</u></a>                                                                                                                                                    | Alhafaji FY, Frederiks BJ, Legemaate J. The Dutch System of Handling Complaints in Health Care. Med Law. 2009;28(2):241-55.                                 |
| New Zealand | <i>Code of Health and Disability Services Consumers' Rights</i>                                                                                                                                                        | New Zealand Health and Disability Commissioner. <i>A review of the Health and Disability Commissioner Act 1994 and Code of</i>                              |

|          |                                                                                                                                                                                                                  |                                                                                                                                                                                                                                                                                                                       |
|----------|------------------------------------------------------------------------------------------------------------------------------------------------------------------------------------------------------------------|-----------------------------------------------------------------------------------------------------------------------------------------------------------------------------------------------------------------------------------------------------------------------------------------------------------------------|
|          |                                                                                                                                                                                                                  | <p><i>Health and Disability Services Consumers' Rights: Report to the Ministry of Health.</i> Auckland: New Zealand Health and Disability Commissioner; 2009.</p> <p>Skegg P. A fortunate experiment? New Zealand's experience with a legislated code of patients' rights. <i>Med Law Rev.</i> 2011;19(2):235-66.</p> |
| Norway   | <p><i>Patients' Rights Act</i> (2001) → Came into force in 2001</p> <p><a href="http://www.ub.uio.no/ujur/ulovdata/lov-19990702-063-eng.pdf">http://www.ub.uio.no/ujur/ulovdata/lov-19990702-063-eng.pdf</a></p> | <p>Magnussen J, Vrangbaek K, Saltman RB, editors. <i>Nordic health care systems: recent reforms and current policy challenges.</i> New York: McGraw-Hill Open University Press; 2009.</p>                                                                                                                             |
| Poland   | <p>“Act on Patients’ Rights and the Commissioner for Patients’ Rights” (2008) (came into effect in 2009)</p>                                                                                                     | <p>Bosek L, Pawliczak J. Codification of patients' rights in Poland--the Patients' Rights Act 2008. <i>Eur J Health Law.</i> 2010;17(4):361-83.</p>                                                                                                                                                                   |
| Portugal | <p><i>Patients' Rights Charter</i> (1997)</p>                                                                                                                                                                    | <p>Barros P, de Almeida Simões J. Portugal: Health system review. <i>Health Syst Transit.</i> 2007; 9(5): 1–140.</p> <p>Nys H, Defloor S, Dierickx K, Goffin T. <i>Patient Rights in the EU – Portugal.</i> Leuven (Belgium): European Ethical-Legal Papers, 2008.</p>                                                |

|          |                                                                                                                                                                                                                                                                                                               |                                                                                                                                                                                                                                                                                                                                                                                                                             |
|----------|---------------------------------------------------------------------------------------------------------------------------------------------------------------------------------------------------------------------------------------------------------------------------------------------------------------|-----------------------------------------------------------------------------------------------------------------------------------------------------------------------------------------------------------------------------------------------------------------------------------------------------------------------------------------------------------------------------------------------------------------------------|
| Québec   | <i>An Act Respecting Health Services and Social Services</i> (1991):<br><a href="http://www2.publicationsduquebec.gouv.qc.ca/dynamicSearch/telecharge.php?type=2&amp;file=/S_4_2/S4_2_A.html">http://www2.publicationsduquebec.gouv.qc.ca/dynamicSearch/telecharge.php?type=2&amp;file=/S_4_2/S4_2_A.html</a> | Regis C. Enhancing patients' confidence in access to health care: the Ontario or Québec way? <i>Health Law J</i> 2004;12:243-73.<br>Québec Ombudsman. <i>Annual report 2009-2010</i> . Québec (QC): The Ombudsman; 2010. Available:<br><a href="http://www.protecteurducitoyen.qc.ca/en/cases-and-documentation/index.html">www.protecteurducitoyen.qc.ca/en/cases-and-documentation/index.html</a> (accessed 2011 May 31). |
| Romania  | <i>Law 46/2003 on the Rights of the Patient</i> (2003)                                                                                                                                                                                                                                                        | Vlădescu C, Scîntee G, Olsavszky V. Romania: Health system review. <i>Health Syst Transit</i> . 2008; 10(3): 1–172.                                                                                                                                                                                                                                                                                                         |
| Slovakia | <i>Charter on the Patients' Rights in the Slovak Republic</i> (2001)                                                                                                                                                                                                                                          | Szalay T, Pažitný P, Szalayová A, Frisová S, Morvay K, Petrovič M, van Ginneken E. Slovakia: Health system review. <i>Health Syst Transit</i> . 2011; 13(2):1–200.<br><br>Defloor S, Nys H, Dierickx K, Goffin T. <i>Patient Rights in the EU – Slovankia</i> . Leuven (Belgium): European Ethical-Legal Papers, 2008.                                                                                                      |
| Spain    | <i>The Spanish Basic Law 41/2002 on the Autonomy of the Patient and the Rights and Obligations with regard to Clinical Information and documentation</i> (2002)                                                                                                                                               | García-Armesto S, Abadía-Taira MB, Durán A, Hernández-Quevedo C, Bernal-Delgado E. Spain: Health system review. <i>Health Syst Transit</i> . 2010; 12(4): 1–295.                                                                                                                                                                                                                                                            |



|                     |                                                                                                                                                                                                                                                                                                                  |                                                                                                                                                                                                                                                                                                                                                                                                                                                                                                                                                                                                                                                                                                                                                                                                                                                                            |
|---------------------|------------------------------------------------------------------------------------------------------------------------------------------------------------------------------------------------------------------------------------------------------------------------------------------------------------------|----------------------------------------------------------------------------------------------------------------------------------------------------------------------------------------------------------------------------------------------------------------------------------------------------------------------------------------------------------------------------------------------------------------------------------------------------------------------------------------------------------------------------------------------------------------------------------------------------------------------------------------------------------------------------------------------------------------------------------------------------------------------------------------------------------------------------------------------------------------------------|
|                     |                                                                                                                                                                                                                                                                                                                  | Defloor S, Nys H, Dierickx K, Goffin T. <i>Patient Rights in the EU – Spain</i> . Leuven (Belgium): European Ethical-Legal Papers, 2008.                                                                                                                                                                                                                                                                                                                                                                                                                                                                                                                                                                                                                                                                                                                                   |
| Trinidad and Tobago | <i>The Patient's Charter of Rights and Obligations</i> (2002):<br><a href="http://www.health.gov.tt/sitepages/default.aspx?id=114">http://www.health.gov.tt/sitepages/default.aspx?id=114</a>                                                                                                                    |                                                                                                                                                                                                                                                                                                                                                                                                                                                                                                                                                                                                                                                                                                                                                                                                                                                                            |
| Turkey              | <i>Regulations on Patients' Rights</i> (1998)                                                                                                                                                                                                                                                                    | Saraçoğlu GV, Tokuç B, Güler F, Gül H. Evaluation of patient rights practices in a developing country: the Edirne model for the implementation of patient rights in Turkey. <i>J Med Ethics</i> . 2010;36(8):488-93.                                                                                                                                                                                                                                                                                                                                                                                                                                                                                                                                                                                                                                                       |
| United Kingdom      | <i>NHS Constitution</i> (2009):<br><a href="http://www.nhs.uk/choiceintheNHS/Rightsandpledges/NHSConstitution/Documents/nhs-constitution-interactive-version-march-2010.pdf">http://www.nhs.uk/choiceintheNHS/Rightsandpledges/NHSConstitution/Documents/nhs-constitution-interactive-version-march-2010.pdf</a> | Parliamentary and Health Service Ombudsman. <i>Customer Satisfaction Research: Summary of Results</i> . London: Parliamentary and Health Service Ombudsman; 2010. Available: <a href="http://www.ombudsman.org.uk/__data/assets/pdf_file/0007/6289/Customersatisfaction.pdf">http://www.ombudsman.org.uk/__data/assets/pdf_file/0007/6289/Customersatisfaction.pdf</a> (accessed 2011 July 1).<br><br>Parliamentary and Health Service Ombudsman. <i>Listening and learning: the Ombudsman's review of complaint handling by the NHS in England 2009-10</i> . London: Parliamentary and Health Service Ombudsman; 2010. Available: <a href="http://nhsreport.ombudsman.org.uk/assets/files/downloads/Listening_and_Learning_HC482-PHSO-0110.pdf">nhsreport.ombudsman.org.uk/assets/files/downloads/Listening_and_Learning_HC482-PHSO-0110.pdf</a> (accessed 2011 June 10). |

|              |                                                                                                                                                                                            |                                                                                                                                                                                                                                                                                                                                                             |
|--------------|--------------------------------------------------------------------------------------------------------------------------------------------------------------------------------------------|-------------------------------------------------------------------------------------------------------------------------------------------------------------------------------------------------------------------------------------------------------------------------------------------------------------------------------------------------------------|
|              |                                                                                                                                                                                            | Parliamentary and Health Service Ombudsman. <i>Impact Study presentation of findings</i> . London: Parliamentary and Health Service Ombudsman; 2010. Available: <a href="http://www.ombudsman.org.uk/__data/assets/pdf_file/0013/4144/Impact-Study.pdf">www.ombudsman.org.uk/__data/assets/pdf_file/0013/4144/Impact-Study.pdf</a> (accessed 2011 June 10). |
| South Africa | <i>Patients' Rights Charter</i> (1996):<br><a href="http://www.doh.gov.za/docs/pamphlets/patientsright/chartere.html">http://www.doh.gov.za/docs/pamphlets/patientsright/chartere.html</a> | London L., Holtman Z, Gilson L, Erasmus E, Khumalo,G, Oyedele S, Ngoma B. <i>Operationalising Health as a Human Right: The Implementation of the Patients' Rights Charter: Final report to the Health Systems Trust in South Africa</i> (Durban: Health Systems Trust, 2006).                                                                               |
